# Supplementary material for: Optimization of Short RNA Aptamers for TNBC Cell Targeting
Source: MDPI journal article supplement (doi:10.3390/ijms23073511), 2022-03-23
Supplement: s1 [file s1]

**Supplementary Table S1. Full-length and short sequence of the three aptamers.** The full-length and short sequences of the three TNBC aptamers are reported. Underlined letters indicate the variable region in the aptamer sequence. Bold letters indicate the 2'F-Pys in the aptamer sequence.

| Full-length |                                                                                                             | Short  |                                                                        |
|-------------|-------------------------------------------------------------------------------------------------------------|--------|------------------------------------------------------------------------|
| TN58        | 5'GGGAAGAGAAGGACAUAUGAU <b>CGUUGUGGUCCCGUUUGC</b><br><u>ACUUUGUUUACGCGCGCAUUGACUAGUACAUGACCACUUGA3'</u>     | sTN58  | 5'GGACAUAUGAUGCAAC <b>CGUUGUGGUC</b><br><b>CCGUUUGCACUUGUUUACG3'</b>   |
| TN145       | 5'GGGAAGAGAAGGACAUAUGAU <b>CCUCAGCGCGCAACUCCCUCC</b><br><u>GUUCCUGCCACGCGUCAUUGACUAGUACAUGACCACUUGA3'</u>   | sTN145 | 5'GGGAAGAGAAGGACAUAUGAU <b>CCUC</b><br><b>AGCGCGCAACUCCCUCCGUUCC3'</b> |
| TN29        | 5'GGGAAGAGAAGGACAUAUGAU <b>CCUGCCCCAACCAUCGCUUCCU</b><br><u>CGACGCGCGUUGUCGGCAUUGACUAGUACAUGACCACUUGA3'</u> | sTN29a | 5'GGAAGAGAAGGACAUAUGAU <b>CCUGC</b><br><b>CCCCAACCAUCGCUUCC3'</b>      |
|             |                                                                                                             | sTN29b | 5' <b>UGCCCCAACCAUCGCUUCCUCGACG</b><br><b>CGCGUUGUCGGCA3'</b>          |

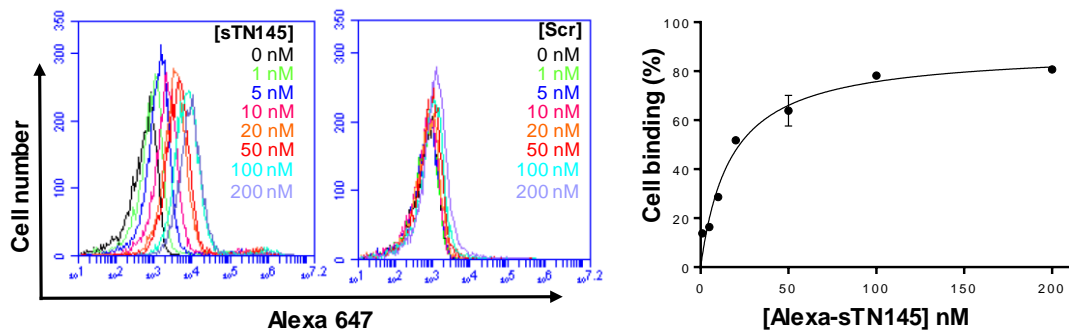

**Supplementary Figure S1. Binding analysis of Alexa 647-labeled sTN145 aptamer with MDA-MB-231 cells by flow cytometry.** (Left) MDA-MB-231 cells were mock-treated or incubated with increasing concentrations of Alexa 647-labeled sTN145 and Scr and binding was analyzed by flow cytometry. (Right) The binding curve, which was obtained by plotting the percentage of cells targeted by the Alexa 647-labeled aptamer against varying aptamer concentrations, is shown. Data shown are mean  $\pm$  SD of three independent experiments.

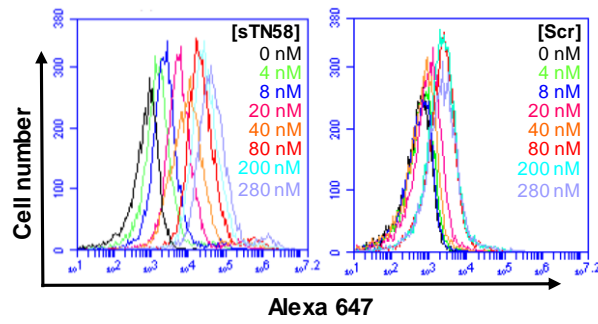

**Supplementary Figure S2. Binding analysis of Alexa 647-labeled sTN58 aptamer with MDA-MB-231/cis cells by flow cytometry.** Shown is the flow cytometry analysis of increasing concentrations of Alexa 647-labeled sTN58 and Scr incubated with MDA-MB-231/cis cells for K<sub>d</sub> calculation (as shown in Figure 3B).

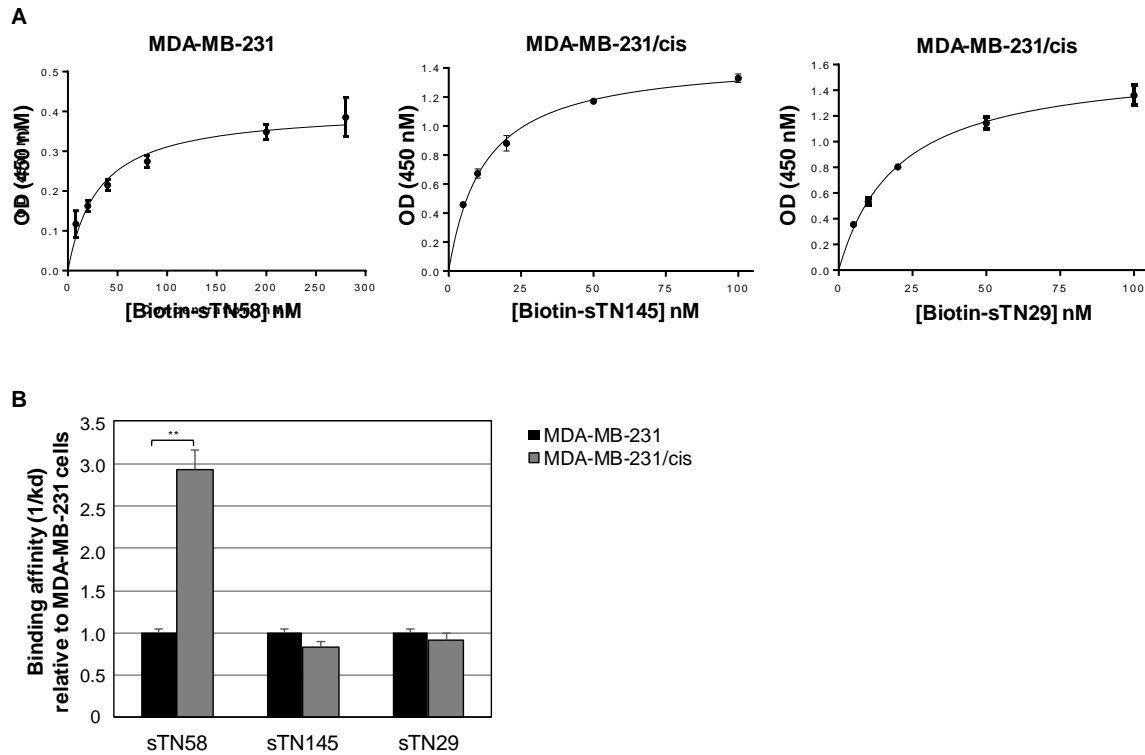

**Supplementary Figure S3. Binding affinities of short aptamers vs parental and chemo-resistant MDA-MB-231 cells.** (A) Shown is the binding curve of 5'-biotinylated sTN58, sTN145 and sTN29 on indicated cell lines. (B) Binding affinity (1/Kd) of short aptamers to MDA-MB-231/cis cells is expressed relative to the corresponding binding affinity to MDA-MB-231 cells. Note that the Kd values obtained on parental and chemo-resistant cells by using the streptavidin-biotin based assay were taken into account for this analysis. Data shown are mean  $\pm$  SD of four independent experiments. \*\* $p < 0.01$ .

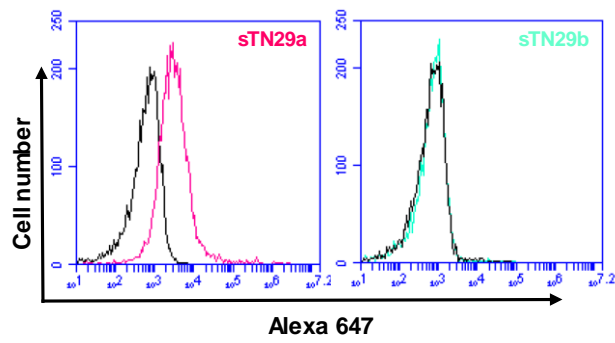

**Supplementary Figure S4. Binding analysis of Alexa 647-labeled sTN29a and sTN29b aptamers with MDA-MB-231 cells by flow cytometry.** MDA-MB-231 cells were incubated with 20 nM Alexa 647-labeled sTN29a (*left*) or sTN29b (*right*), and binding was analyzed by flow cytometry. The results are shown relative to the control-cells (black line).

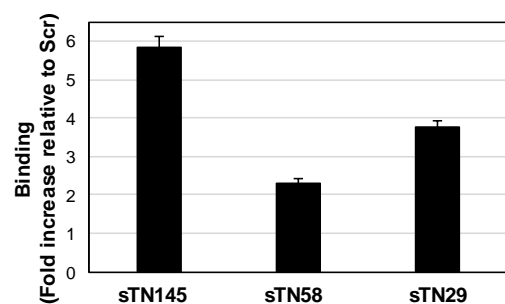

**Supplementary Figure S5. Binding of short aptamers to BT-549 cells.** Binding of sTN145, sTN58, sTN29 (200-nM final concentration, colorimetric assay) on BT-549 TNBC cells. The results are expressed relative to the background binding detected with the Scr negative control. Bars depict mean  $\pm$  SD of three independent experiments.
